# Supplementary material
Source: publisher figshare collection journal article supplement (https://gsapubs.figshare.com/ndownloader/files/23293196)

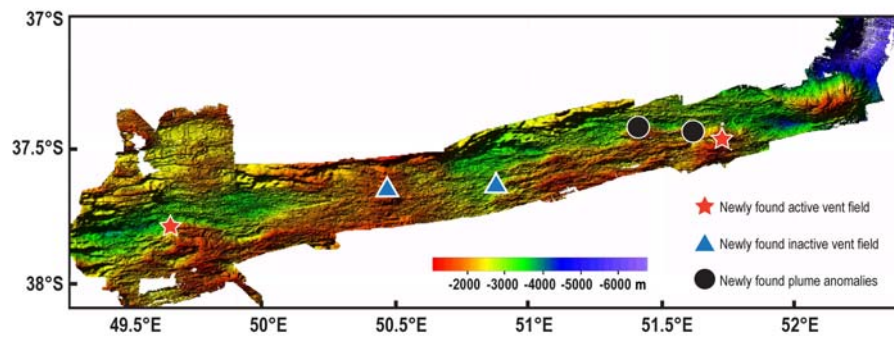

Figure DR1

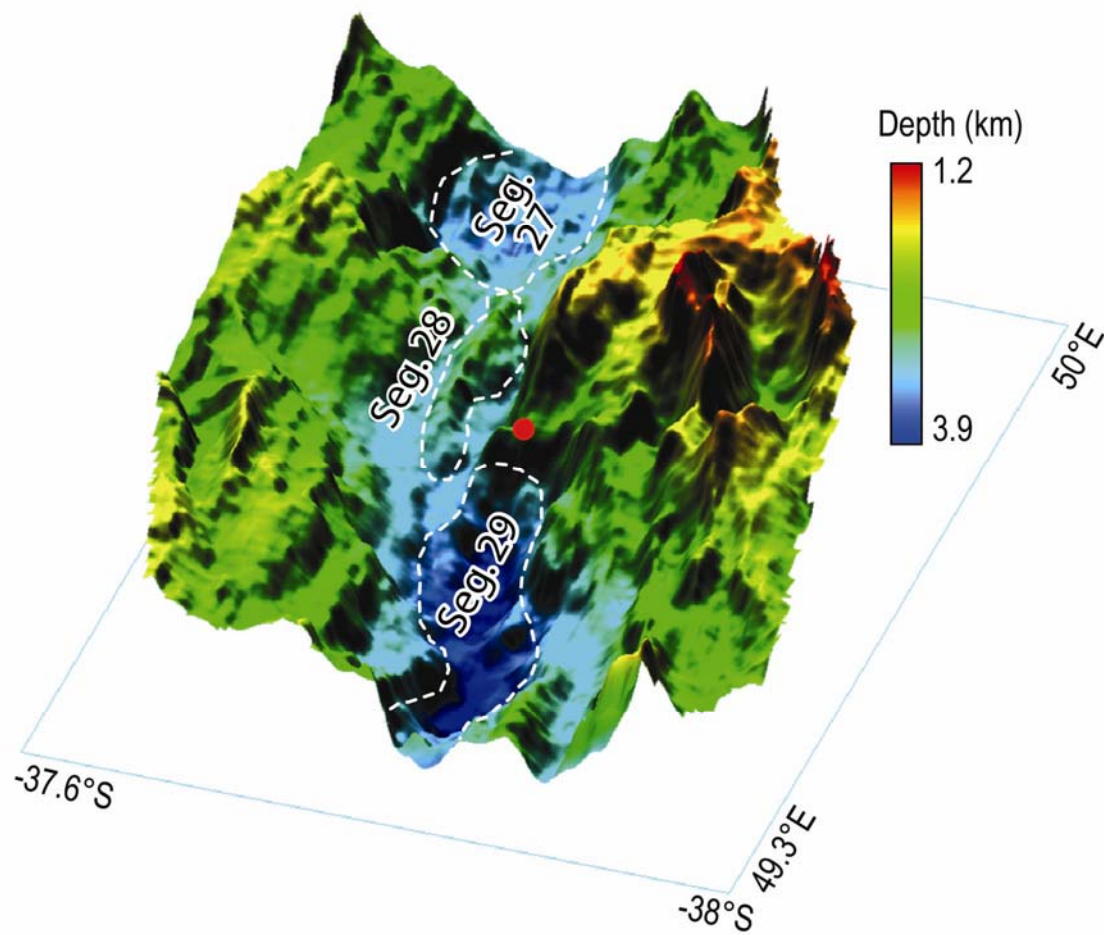

Figure DR2

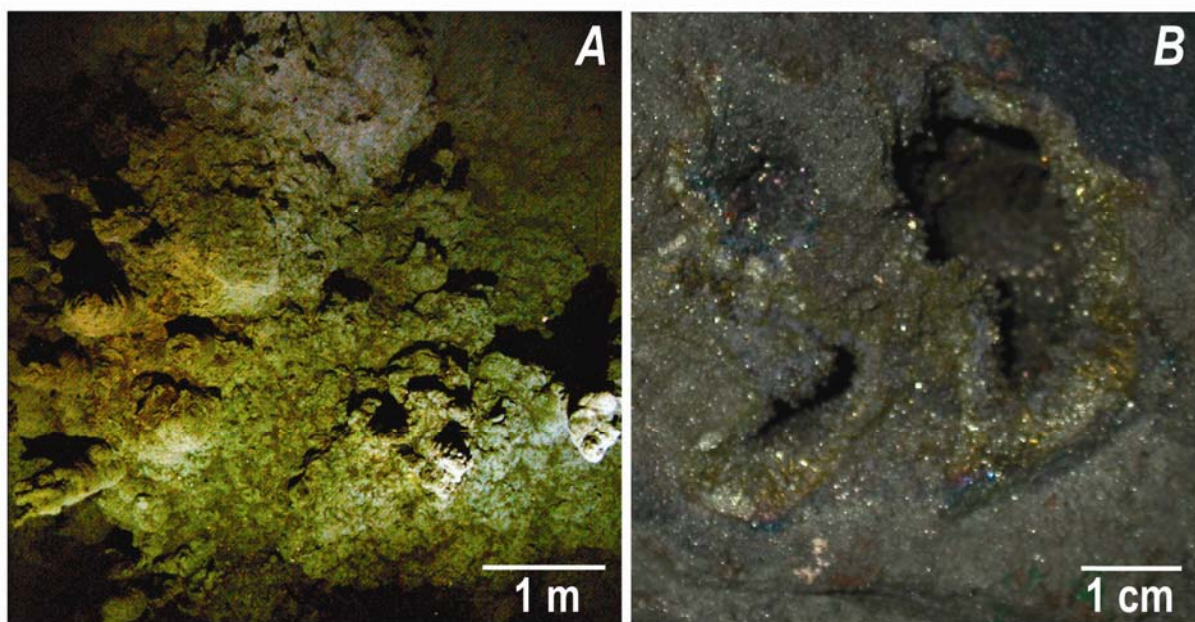

**Figure DR3**

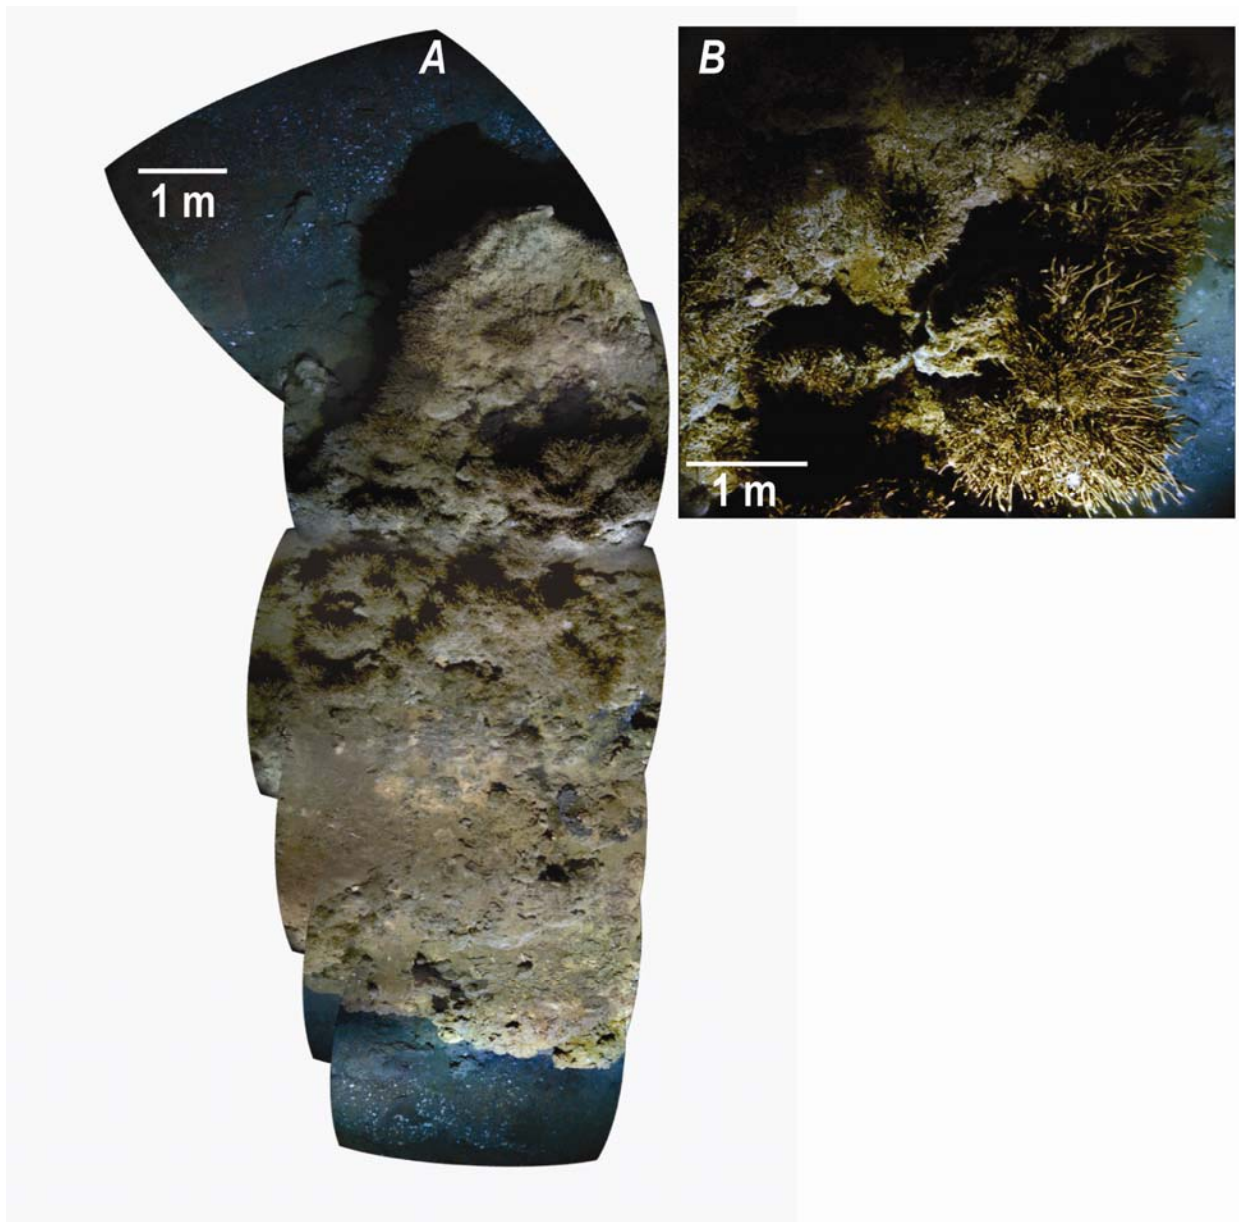

**Figure DR4**



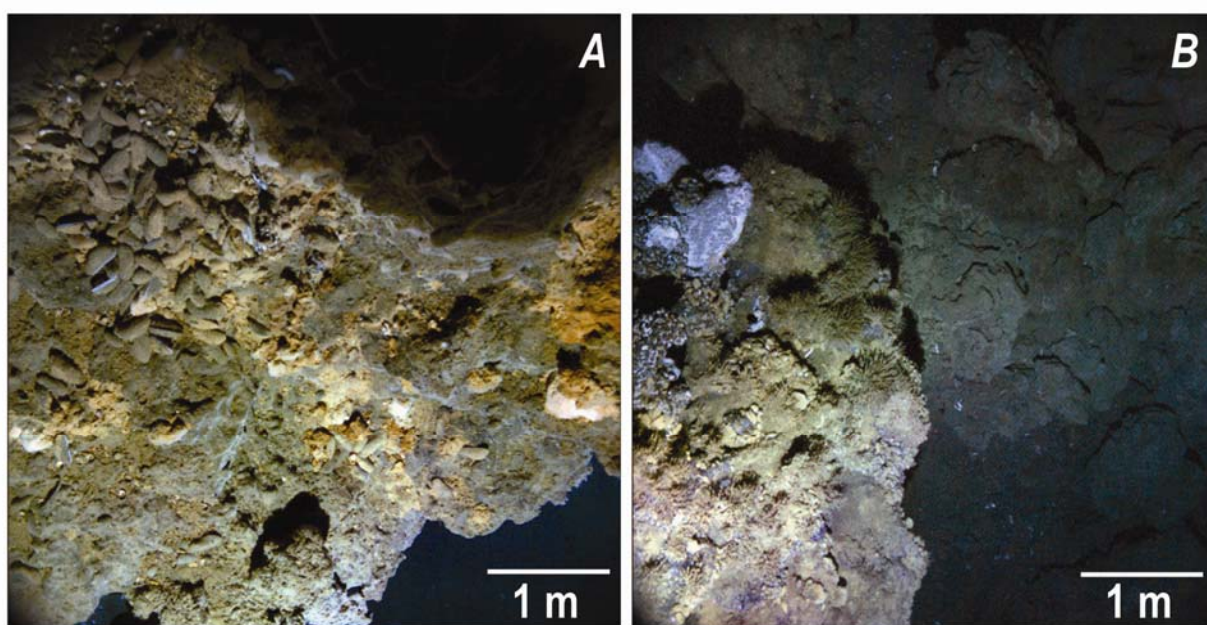

Figure DR5

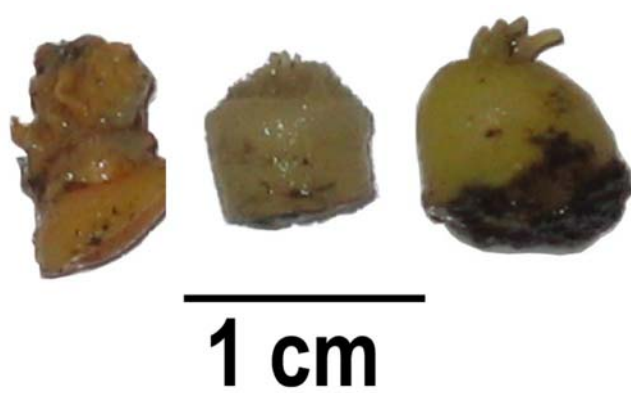

Figure DR6

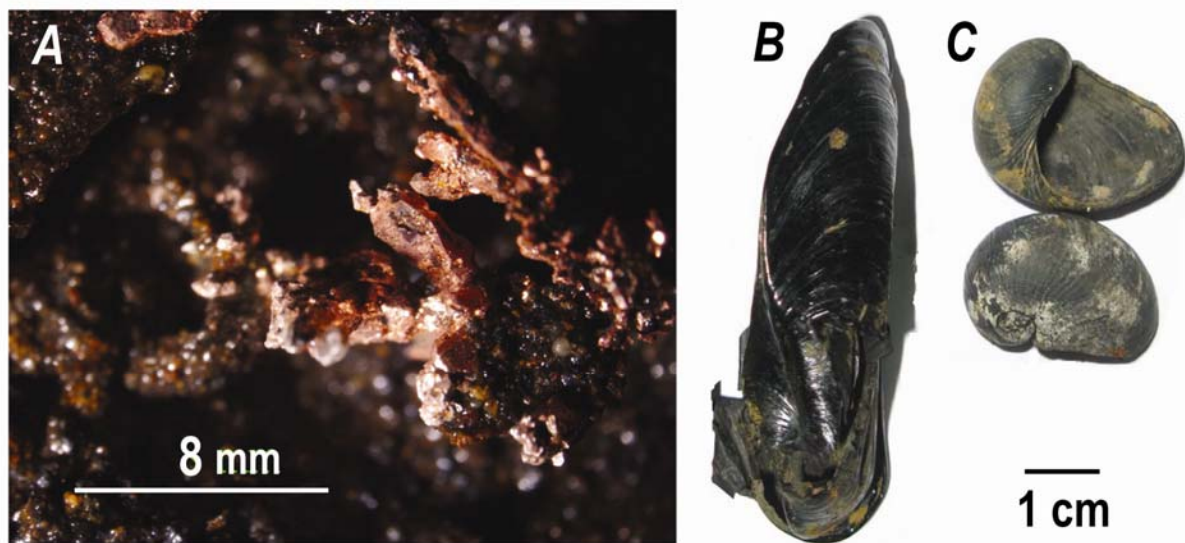

**Figure DR7**

Supplement: Supplementary file 1 [file 23293196]
